# Supplementary material for: Immunotherapy-induced antibodies to endogenous retroviral envelope glycoprotein confer tumor protection in mice
Source: PubMed Central journal article supplement (PMC8049297; doi:10.1371/journal.pone.0248903), 2021-04-15
Supplement: pone.0248903.s013.pdf [file pone.0248903.s013.pdf]

Raw images for Fig 1D

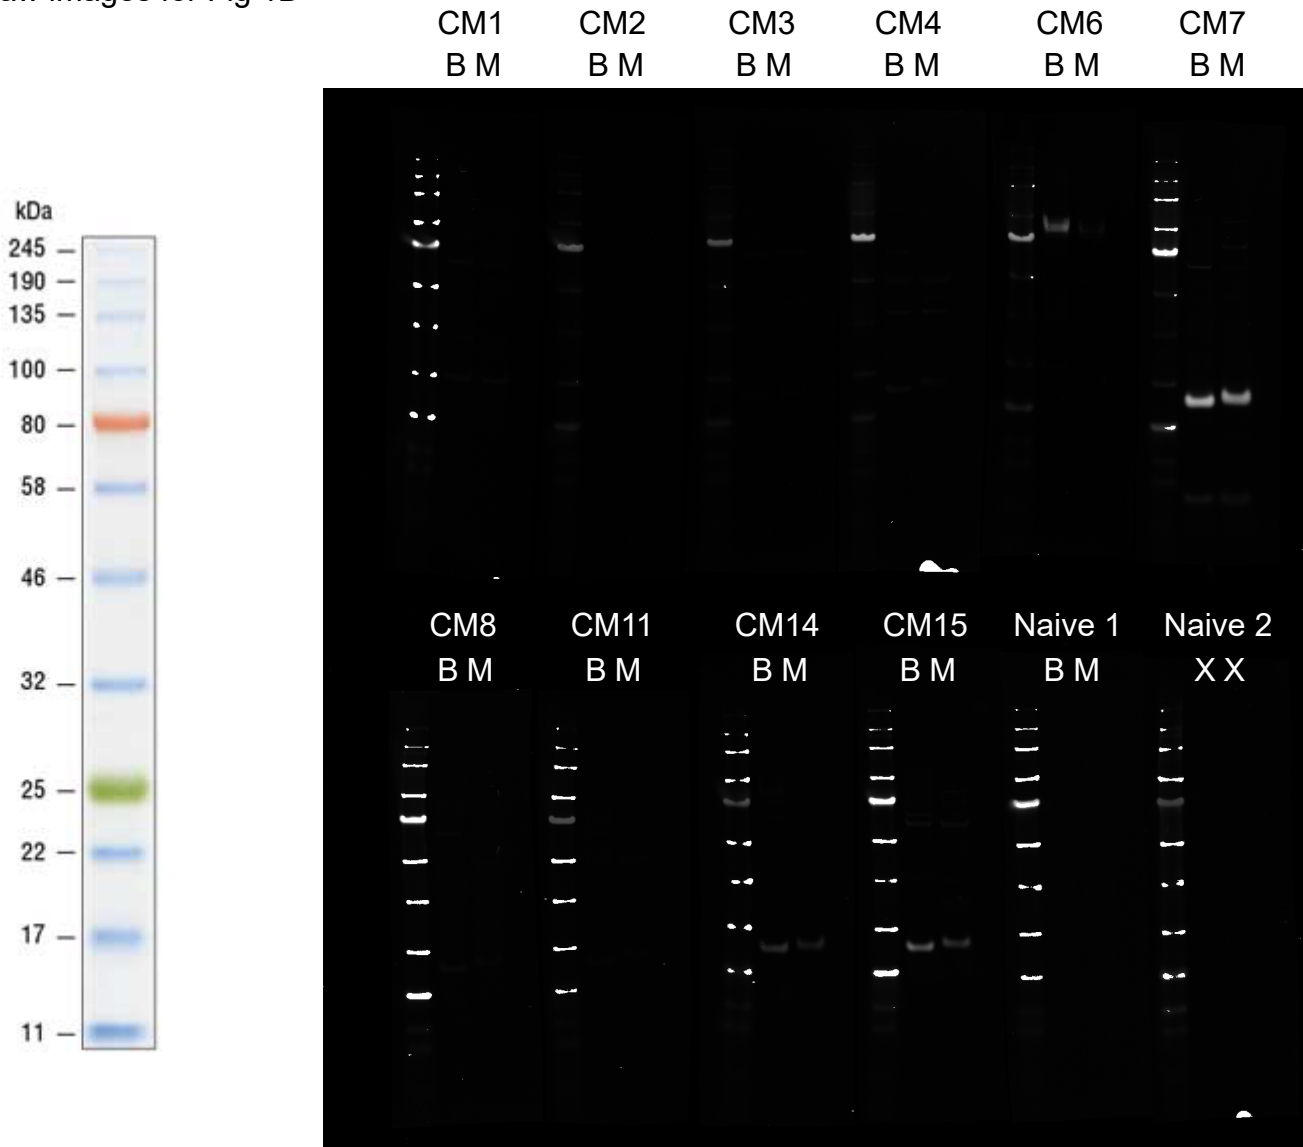

TA99

B M X X X X

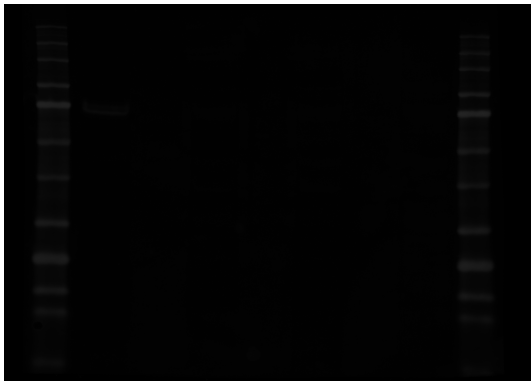

B = B16F10 membrane proteins  
M = MC38 membrane proteins

Scanned with LI-COR Odyssey 9120 Imager in 800 nm channel

## Raw images for Fig 2B

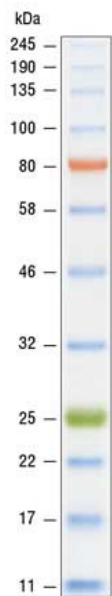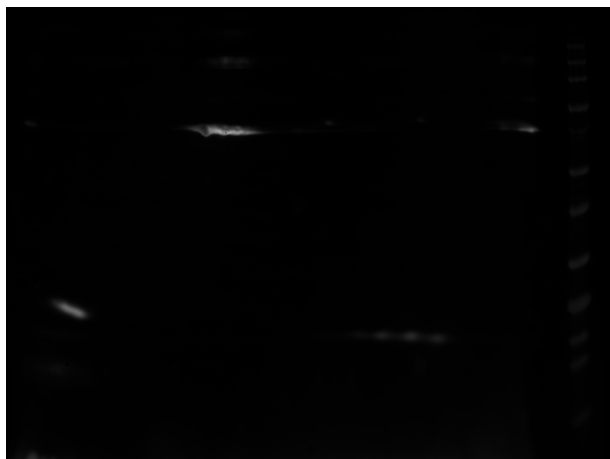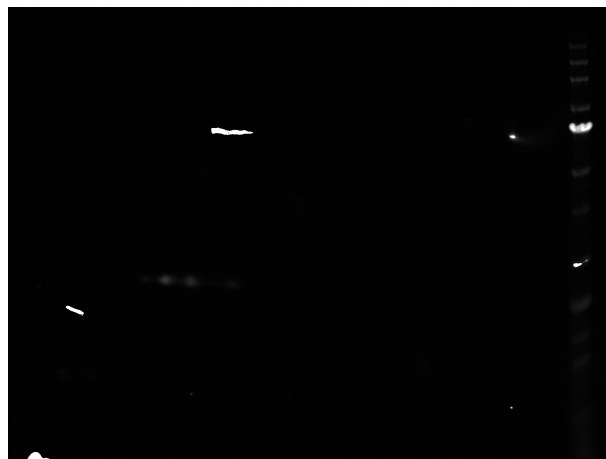

B16F10 membrane proteins and streptavidin-conjugated control proteins were probed with CM7 serum. The immunoblot was scanned with LI-COR Odyssey 9120 Imager in 700 nm (left) or 800 nm (right) channel.

## Raw images for Fig 2C,D

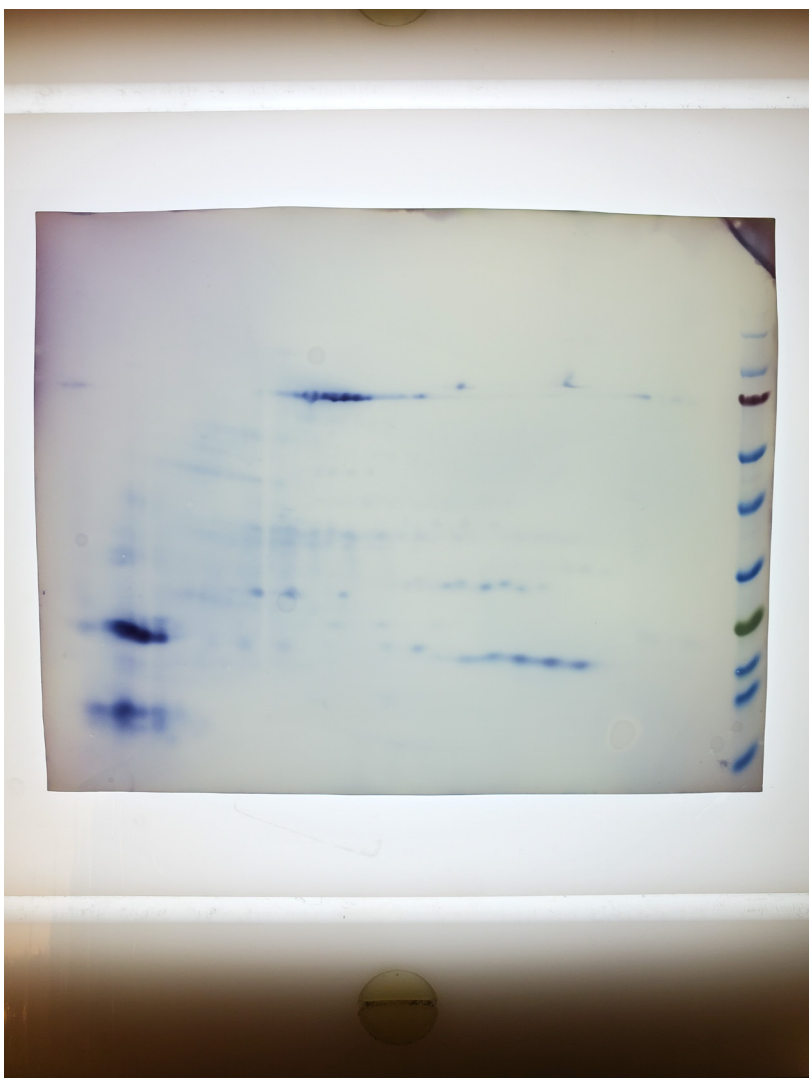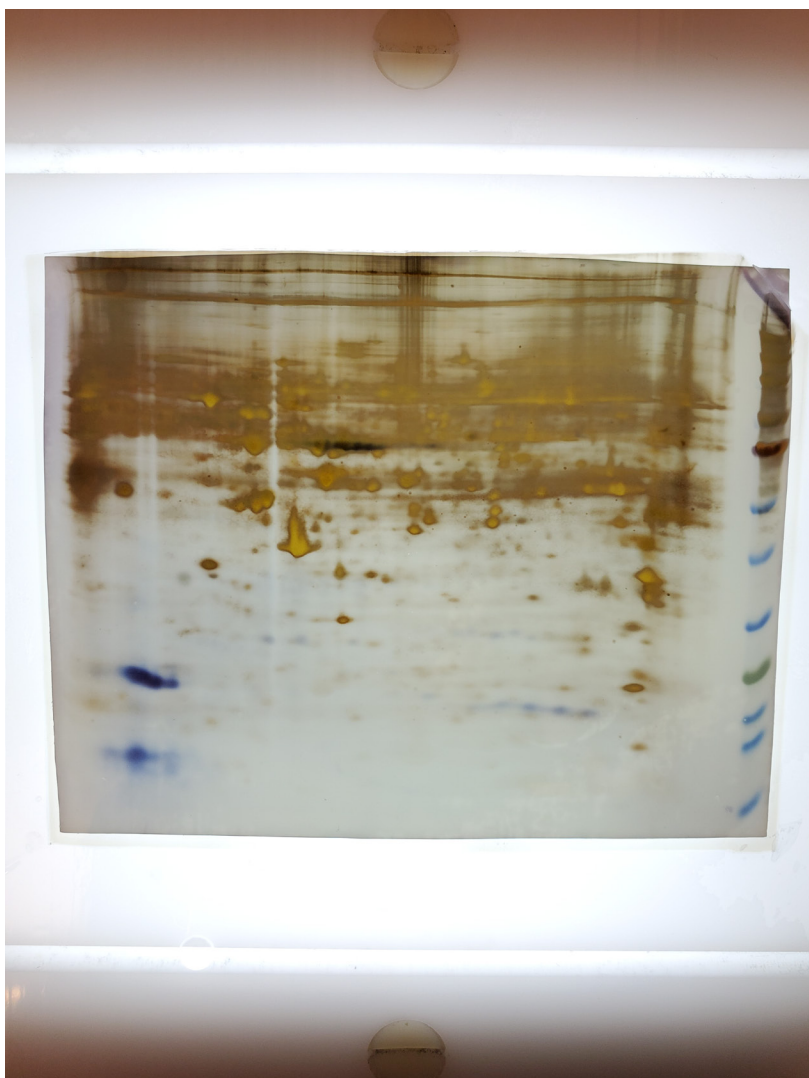

B16F10 membrane proteins and streptavidin-conjugated control proteins were probed with CM7 serum. The immunoblot and the gel were imaged with Samsung SM-G973U.

# Raw images for Fig 3A

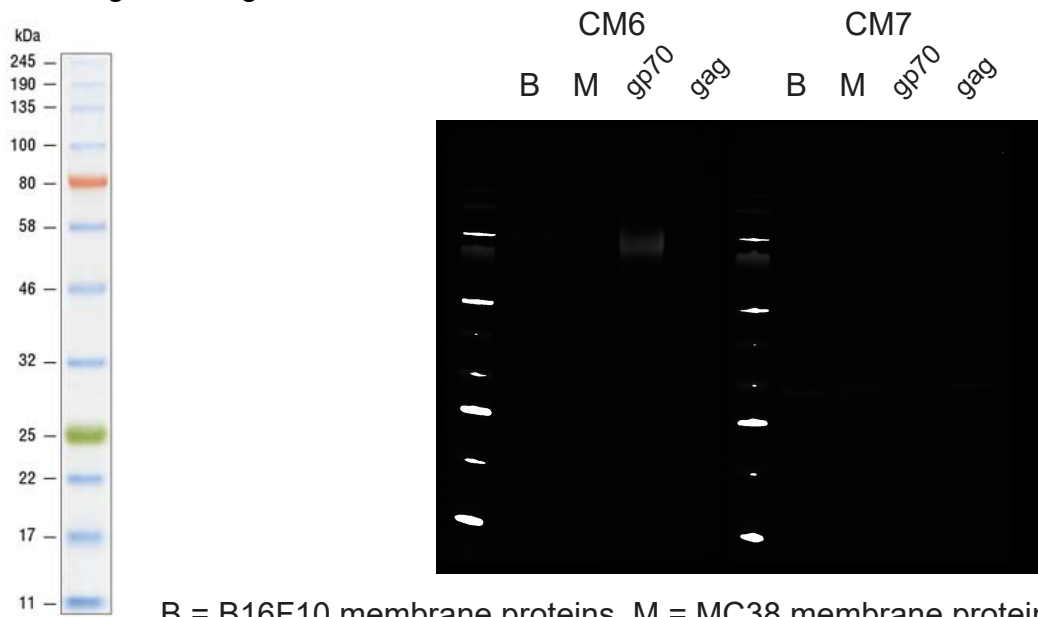

B = B16F10 membrane proteins, M = MC38 membrane proteins

Indicated samples were probed with CM6 (left) and CM7 (right) serum.

The immunoblot was scanned with LI-COR Odyssey 9120 Imager in 800 nm channel.

## Raw images for S2A Fig

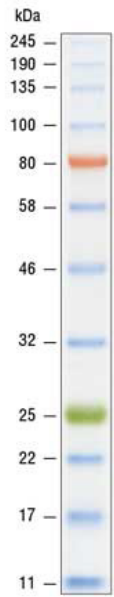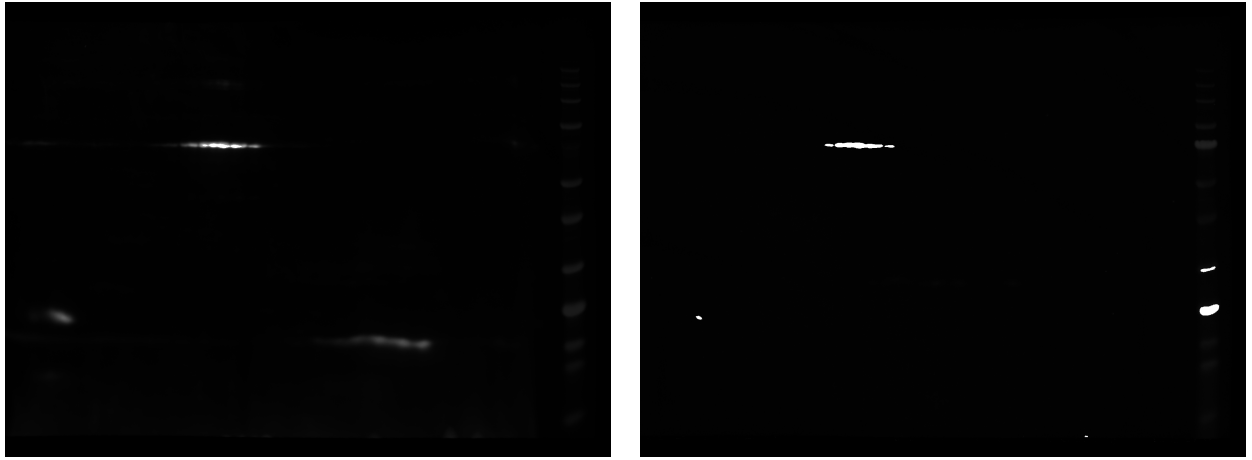

MC38 membrane proteins and streptavidin-conjugated control proteins were probed with CM7 serum. The immunoblot was scanned with LI-COR Odyssey 9120 Imager in 700 nm (left) or 800 nm (right) channel.

## Raw images for S2B,C Fig

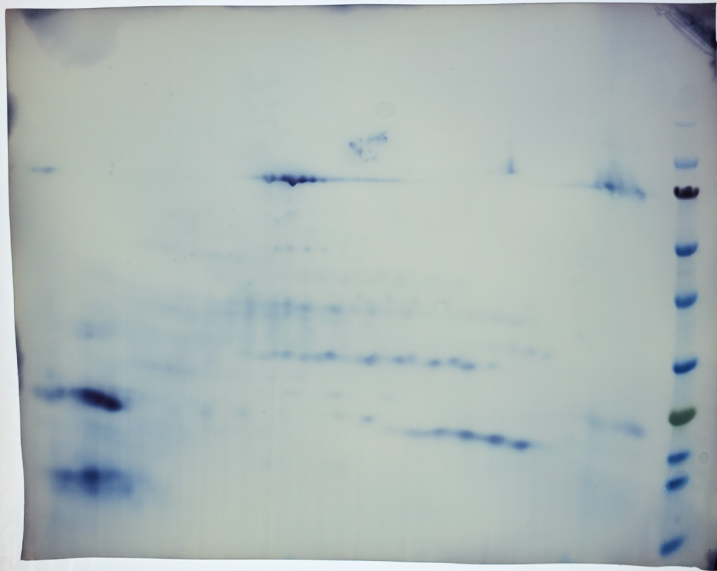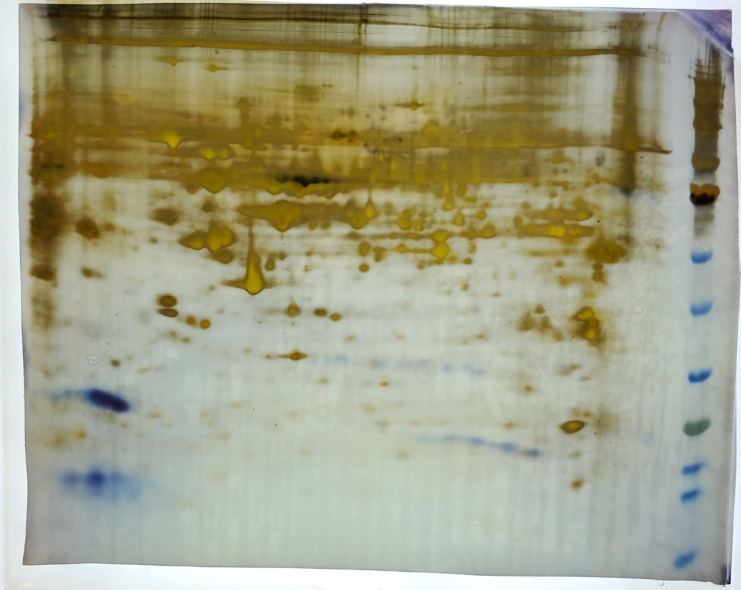

MC38 membrane proteins and streptavidin-conjugated control proteins were probed with CM7 serum. The immunoblot and the gel were imaged with Samsung SM-G973U.



### Raw images for S3A Fig

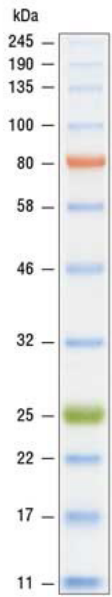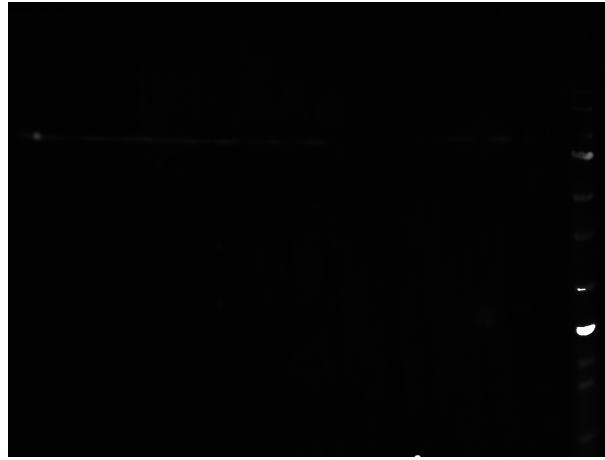

B16F10 membrane proteins and streptavidin-conjugated control proteins were probed with CM6 serum. The immunoblot was scanned with LI-COR Odyssey 9120 Imager in 800 nm channel.

### Raw images for S3B,C Fig

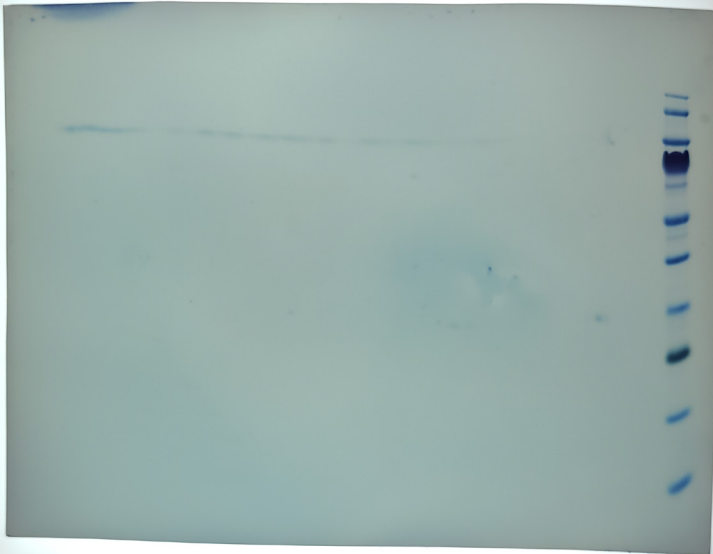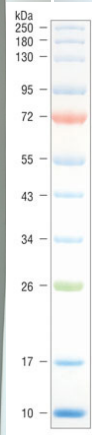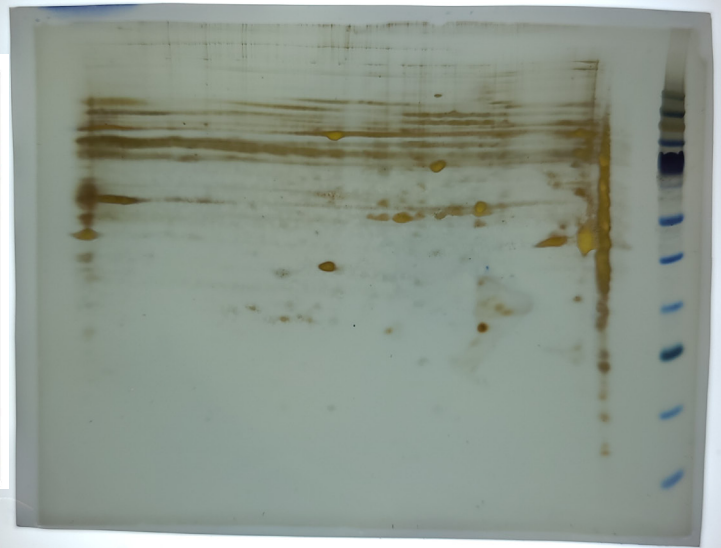

B16F10 membrane proteins and streptavidin-conjugated control proteins were probed with CM6 serum. The immunoblot and the gel were imaged with Samsung SM-G981U.
